# Supplementary material for: Sex-Dependent Synergism of an Edible THC: CBD Formulation in Reducing Anxiety and Depressive-like Symptoms Following Chronic Stress
Source: PubMed Central journal article supplement (PMC11333796; doi:10.2174/1570159x21666230912101441), 2023-09-12
Supplement: CN-22-2059_SD1.pdf [file CN-22-2059_SD1.pdf]

## Supplementary Material

# Sex-Dependent Synergism of an Edible THC: CBD Formulation in Reducing Anxiety and Depressive-like Symptoms Following Chronic Stress

Enzo Pérez-Valenzuela<sup>1,2,4</sup>, Roger Hudson<sup>1,2,4</sup>, Taygun Uzuneser<sup>1,2,4</sup>, Marta De Felice<sup>1,2,4</sup>, Hanna Szkudlarek<sup>1,2,4</sup>, Walter Rushlow<sup>1,2,3,4</sup> and Steven R. Laviolette<sup>1,2,3,4,\*</sup>

<sup>1</sup>Addiction Research Group, Schulich School of Medicine & Dentistry, University of Western Ontario, Canada; <sup>2</sup>Department of Anatomy & Cell Biology, Schulich School of Medicine & Dentistry, University of Western Ontario, Canada; <sup>3</sup>Department of Psychiatry, Schulich School of Medicine & Dentistry, University of Western Ontario, Canada; <sup>4</sup>Lawson Health Research Institute, Schulich School of Medicine & Dentistry, University of Western Ontario, Canada

**Table S1. The number of male animals used in each behavioural experiment.**

|                           | Non-Stressed |     |     |         | Stressed |     |     |         |
|---------------------------|--------------|-----|-----|---------|----------|-----|-----|---------|
|                           | Vehicle      | CBD | THC | THC:CBD | Vehicle  | CBD | THC | THC:CBD |
| <b>Open Field</b>         | 11           | 8   | 10  | 15      | 10       | 10  | 10  | 10      |
| <b>EPM</b>                | 14           | 8   | 9   | 15      | 10       | 9   | 10  | 9       |
| <b>L/D Box</b>            | 14           | 10  | 10  | 12      | 9        | 10  | 10  | 10      |
| <b>Social Interaction</b> | 10           | 8   | 8   | 10      | 10       | 7   | 9   | 8       |
| <b>Sucrose Preference</b> | 13           | 9   | 9   | 15      | 9        | 9   | 10  | 8       |
| <b>FST</b>                | 13           | 10  | 10  | 14      | 8        | 7   | 10  | 10      |

**Table S2. The number of female animals used in each behavioural experiment.**

|                           | Non-Stressed |     |     |         | Stressed |     |     |         |
|---------------------------|--------------|-----|-----|---------|----------|-----|-----|---------|
|                           | Vehicle      | CBD | THC | THC:CBD | Vehicle  | CBD | THC | THC:CBD |
| <b>Open Field</b>         | 10           | 11  | 11  | 11      | 10       | 10  | 9   | 9       |
| <b>EPM</b>                | 11           | 11  | 11  | 11      | 10       | 10  | 10  | 10      |
| <b>L/D Box</b>            | 9            | 10  | 10  | 11      | 9        | 9   | 8   | 8       |
| <b>Social Interaction</b> | 11           | 11  | 11  | 11      | 10       | 10  | 9   | 10      |
| <b>Sucrose Preference</b> | 8            | 10  | 10  | 9       | 7        | 9   | 9   | 8       |
| <b>FST</b>                | 11           | 10  | 11  | 10      | 10       | 9   | 9   | 10      |

**Table S3. The number of recorded cells in each electrophysiological experiment.**

|        |     | Non-Stressed |     |     |         | Stressed |     |     |         |
|--------|-----|--------------|-----|-----|---------|----------|-----|-----|---------|
|        |     | Vehicle      | CBD | THC | THC:CBD | Vehicle  | CBD | THC | THC:CBD |
| Male   | PFC | 38           | 21  | 42  | 44      | 33       | 19  | 37  | 32      |
|        | VTA | 12           | 8   | 8   | 23      | 10       | 6   | 13  | 10      |
| Female | PFC | 16           | 19  | 35  | 24      | 34       | 50  | 37  | 31      |
|        | VTA | 9            | 10  | 12  | 17      | 12       | 14  | 9   | 9       |

**Table S4. The number of male animals used in each molecular experiment.**

|     |                                | Non-Stressed |         | Stressed |         |
|-----|--------------------------------|--------------|---------|----------|---------|
|     |                                | Vehicle      | THC:CBD | Vehicle  | THC:CBD |
| NAC | pAkt:tAkt                      | 6            | 6       | 5        | 5       |
|     | pGSK3 $\alpha$ :tGSK3 $\alpha$ | 6            | 5       | 5        | 5       |
|     | pGSK3 $\beta$ :tGSK3 $\beta$   | 6            | 5       | 5        | 5       |
|     | pmTOR:tmTOR                    | 6            | 5       | 5        | 6       |
|     | BDNF                           | 5            | 5       | 6        | 6       |
|     | D1-R                           | 6            | 6       | 5        | 5       |
|     | D2-R                           | 6            | 6       | 6        | 6       |
| PFC | pAkt:tAkt                      | 6            | 6       | 6        | 5       |
|     | pGSK3 $\alpha$ :tGSK3 $\alpha$ | 6            | 6       | 6        | 5       |
|     | pGSK3 $\beta$ :tGSK3 $\beta$   | 6            | 6       | 6        | 5       |
|     | pmTOR:tmTOR                    | 4            | 6       | 5        | 4       |
|     | BDNF                           | 5            | 4       | 4        | 4       |
|     | D1-R                           | 6            | 6       | 5        | 5       |
|     | D2-R                           | 6            | 6       | 6        | 6       |

**Table S5. The number of female animals used in each molecular experiment.**

|     |                                | Non-Stressed |         | Stressed |         |
|-----|--------------------------------|--------------|---------|----------|---------|
|     |                                | Vehicle      | THC:CBD | Vehicle  | THC:CBD |
| NAC | pAkt:tAkt                      | 6            | 7       | 6        | 5       |
|     | pGSK3 $\alpha$ :tGSK3 $\alpha$ | 8            | 6       | 6        | 6       |
|     | pGSK3 $\beta$ :tGSK3 $\beta$   | 8            | 6       | 6        | 6       |
|     | pmTOR:tmTOR                    | 7            | 8       | 6        | 5       |
|     | BDNF                           | 6            | 7       | 5        | 5       |
|     | D1-R                           | 8            | 8       | 6        | 6       |
|     | D2-R                           | 7            | 8       | 6        | 5       |
| PFC | pAkt:tAkt                      | 6            | 7       | 6        | 6       |
|     | pGSK3 $\alpha$ :tGSK3 $\alpha$ | 8            | 8       | 6        | 6       |
|     | pGSK3 $\beta$ :tGSK3 $\beta$   | 8            | 8       | 6        | 6       |
|     | pmTOR:tmTOR                    | 7            | 8       | 6        | 6       |
|     | BDNF                           | 8            | 7       | 6        | 6       |
|     | D1-R                           | 8            | 7       | 6        | 6       |
|     | D2-R                           | 7            | 5       | 6        | 6       |

**Table S6. Three-way ANOVA (Treatment x Stress x Sex) in behavioural tests.**

|                                 | Total Distance (Open Field) |          | Open arms time (EPM) |          | Second Latency (L/D Box) |          | Social Motivation  |          |
|---------------------------------|-----------------------------|----------|----------------------|----------|--------------------------|----------|--------------------|----------|
|                                 | F (DFn, DFd)                | P value  | F (DFn, DFd)         | P value  | F (DFn, DFd)             | P value  | F (DFn, DFd)       | P value  |
| <b>Treatment</b>                | F (3, 149) = 0.1880         | P=0.9044 | F (3, 152) = 2.643   | P=0.0513 | F (3, 143) = 0.9266      | P=0.4297 | F (3, 137) = 1.881 | P=0.1357 |
| <b>Stress</b>                   | F (1, 149) = 28.20          | P<0.0001 | F (1, 152) = 0.1628  | P=0.6871 | F (1, 143) = 69.44       | P<0.0001 | F (1, 137) = 0.976 | P=0.3250 |
| <b>Sex</b>                      | F (1, 149) = 4.765          | P=0.0306 | F (1, 152) = 11.32   | P=0.0010 | F (1, 143) = 0.2086      | P=0.6486 | F (1, 137) = 10.57 | P=0.0014 |
| <b>Treatment x Stress</b>       | F (3, 149) = 3.057          | P=0.0303 | F (3, 152) = 1.831   | P=0.1439 | F (3, 143) = 2.184       | P=0.0925 | F (3, 137) = 1.813 | P=0.1477 |
| <b>Treatment x Sex</b>          | F (3, 149) = 0.1686         | P=0.9174 | F (3, 152) = 4.601   | P=0.0041 | F (3, 143) = 2.078       | P=0.1058 | F (3, 137) = 5.523 | P=0.0013 |
| <b>Stress x Sex</b>             | F (1, 149) = 10.69          | P=0.0013 | F (1, 152) = 0.03170 | P=0.8589 | F (1, 143) = 6.111       | P=0.0146 | F (1, 137) = 1.102 | P=0.2958 |
| <b>Treatment x Stress x Sex</b> | F (3, 149) = 1.259          | P=0.2907 | F (3, 152) = 1.193   | P=0.3144 | F (3, 143) = 3.259       | P=0.0234 | F (3, 137) = 4.510 | P=0.0047 |
|                                 | Social Recognition          |          | Sucrose Preference   |          | Immobility Time (FST)    |          |                    |          |
|                                 | F (DFn, DFd)                | P value  | F (DFn, DFd)         | P value  | F (DFn, DFd)             | P value  |                    |          |
| <b>Treatment</b>                | F (3, 137) = 0.6972         | P=0.5553 | F (3, 136) = 1.319   | P=0.2709 | F (3, 146) = 1.035       | P=0.3792 |                    |          |
| <b>Stress</b>                   | F (1, 137) = 0.0011         | P=0.9738 | F (1, 136) = 9.909   | P=0.0020 | F (1, 146) = 56.15       | P<0.0001 |                    |          |
| <b>Sex</b>                      | F (1, 137) = 0.3001         | P=0.5847 | F (1, 136) = 1.311   | P=0.2543 | F (1, 146) = 60.16       | P<0.0001 |                    |          |
| <b>Treatment x Stress</b>       | F (3, 137) = 0.5522         | P=0.6475 | F (3, 136) = 4.990   | P=0.0026 | F (3, 146) = 2.367       | P=0.0732 |                    |          |
| <b>Treatment x Sex</b>          | F (3, 137) = 1.015          | P=0.3880 | F (3, 136) = 0.1914  | P=0.9021 | F (3, 146) = 0.4771      | P=0.6987 |                    |          |
| <b>Stress x Sex</b>             | F (1, 137) = 0.8496         | P=0.3583 | F (1, 136) = 9.688   | P=0.0023 | F (1, 146) = 53.98       | P<0.0001 |                    |          |
| <b>Treatment x Stress x Sex</b> | F (3, 137) = 1.217          | P=0.3058 | F (3, 136) = 1.908   | P=0.1312 | F (3, 146) = 3.524       | P=0.0166 |                    |          |

**Table S7. Three-way ANOVA (Treatment x Stress x Sex) in electrophysiological measures of PFC and VTA neurons.**

|                                 | Firing Rate - PFC   |          | % Burst - PFC      |          | Firing Rate - VTA   |          | % Burst - VTA      |          |
|---------------------------------|---------------------|----------|--------------------|----------|---------------------|----------|--------------------|----------|
|                                 | F (DFn, DFd)        | P value  | F (DFn, DFd)       | P value  | F (DFn, DFd)        | P value  | F (DFn, DFd)       | P value  |
| <b>Treatment</b>                | F (3, 496) = 3.923  | P=0.0087 | F (3, 496) = 2.593 | P=0.0520 | F (3, 167) = 1.344  | P=0.2619 | F (3, 166) = 1.243 | P=0.2958 |
| <b>Stress</b>                   | F (1, 496) = 6.279  | P=0.0125 | F (1, 496) = 3.807 | P=0.0516 | F (1, 167) = 2.163  | P=0.1433 | F (1, 166) = 0.006 | P=0.9383 |
| <b>Sex</b>                      | F (1, 496) = 24.09  | P<0.0001 | F (1, 496) = 22.74 | P<0.0001 | F (1, 167) = 2.285  | P=0.1325 | F (1, 166) = 17.67 | P<0.0001 |
| <b>Treatment x Stress</b>       | F (3, 496) = 4.360  | P=0.0048 | F (3, 496) = 2.899 | P=0.0346 | F (3, 167) = 1.749  | P=0.1590 | F (3, 166) = 0.347 | P=0.7911 |
| <b>Treatment x Sex</b>          | F (3, 496) = 3.253  | P=0.0215 | F (3, 496) = 1.664 | P=0.1739 | F (3, 167) = 3.191  | P=0.0251 | F (3, 166) = 0.417 | P=0.7414 |
| <b>Stress x Sex</b>             | F (1, 496) = 0.1157 | P=0.7339 | F (1, 496) = 1.624 | P=0.2031 | F (1, 167) = 0.9312 | P=0.3360 | F (1, 166) = 0.033 | P=0.8560 |
| <b>Treatment x Stress x Sex</b> | F (3, 496) = 3.494  | P=0.0156 | F (3, 496) = 0.950 | P=0.4160 | F (3, 167) = 0.8522 | P=0.4673 | F (3, 166) = 2.246 | P=0.0849 |

Table S8. Three-way ANOVA (Treatment x Stress x Sex) of molecular markers in NAc.

|                                 | pAkt:tAkt          |          | pGSK3 $\alpha$ :tGSK3 $\alpha$ |          | pGSK3 $\beta$ :tGSK3 $\beta$ |          | pmTOR:tmTOR        |          |
|---------------------------------|--------------------|----------|--------------------------------|----------|------------------------------|----------|--------------------|----------|
|                                 | F (DFn, DFd)       | P value  | F (DFn, DFd)                   | P value  | F (DFn, DFd)                 | P value  | F (DFn, DFd)       | P value  |
| <b>Treatment</b>                | F (1, 38) = 10.62  | P=0.0024 | F (1, 37) = 0.288              | P=0.5950 | F (1, 39) = 0.041            | P=0.8408 | F (1, 40) = 1.544  | P=0.2213 |
| <b>Stress</b>                   | F (1, 38) = 11.48  | P=0.0016 | F (1, 37) = 14.27              | P=0.0006 | F (1, 39) = 9.335            | P=0.0040 | F (1, 40) = 5.747  | P=0.0213 |
| <b>Sex</b>                      | F (1, 38) = 8.692  | P=0.0054 | F (1, 37) = 0.316              | P=0.5777 | F (1, 39) = 5.334            | P=0.0263 | F (1, 40) = 1.457  | P=0.2345 |
| <b>Treatment x Stress</b>       | F (1, 38) = 0.827  | P=0.3688 | F (1, 37) = 0.044              | P=0.8356 | F (1, 39) = 0.4062           | P=0.5276 | F (1, 40) = 4.788  | P=0.0346 |
| <b>Treatment x Sex</b>          | F (1, 38) = 11.65  | P=0.0015 | F (1, 37) = 3.064              | P=0.0883 | F (1, 39) = 0.3657           | P=0.5488 | F (1, 40) = 0.7104 | P=0.4043 |
| <b>Stress x Sex</b>             | F (1, 38) = 25.45  | P<0.0001 | F (1, 37) = 2.201              | P=0.1464 | F (1, 39) = 7.321            | P=0.0101 | F (1, 40) = 0.0391 | P=0.8443 |
| <b>Treatment x Stress x Sex</b> | F (1, 38) = 1.733  | P=0.1960 | F (1, 37) = 2.026              | P=0.1630 | F (1, 39) = 1.002            | P=0.3230 | F (1, 40) = 0.0278 | P=0.8685 |
|                                 | BDNF               |          | D1-R                           |          | D2-R                         |          |                    |          |
|                                 | F (DFn, DFd)       | P value  | F (DFn, DFd)                   | P value  | F (DFn, DFd)                 | P value  |                    |          |
| <b>Treatment</b>                | F (1, 37) = 0.2367 | P=0.6295 | F (1, 41) = 0.039              | P=0.8444 | F (1, 40) = 0.198            | P=0.6585 |                    |          |
| <b>Stress</b>                   | F (1, 37) = 1.889  | P=0.1776 | F (1, 41) = 17.65              | P=0.0001 | F (1, 40) = 5.808            | P=0.0206 |                    |          |
| <b>Sex</b>                      | F (1, 37) = 5.886  | P=0.0203 | F (1, 41) = 24.81              | P<0.0001 | F (1, 40) = 18.37            | P=0.0001 |                    |          |
| <b>Treatment x Stress</b>       | F (1, 37) = 6.341  | P=0.0163 | F (1, 41) = 0.950              | P=0.3354 | F (1, 40) = 2.436            | P=0.1264 |                    |          |
| <b>Treatment x Sex</b>          | F (1, 37) = 1.172  | P=0.2860 | F (1, 41) = 0.853              | P=0.3610 | F (1, 40) = 1.246            | P=0.2710 |                    |          |
| <b>Stress x Sex</b>             | F (1, 37) = 3.126  | P=0.0853 | F (1, 41) = 20.29              | P<0.0001 | F (1, 40) = 13.54            | P=0.0007 |                    |          |
| <b>Treatment x Stress x Sex</b> | F (1, 37) = 3.030  | P=0.0901 | F (1, 41) = 0.199              | P=0.6571 | F (1, 40) = 2.968            | P=0.0926 |                    |          |

Table S9. Three-way ANOVA (Treatment x Stress x Sex) of molecular markers in PFC.

|  | pAkt:tAkt | pGSK3 $\alpha$ :tGSK3 $\alpha$ | pGSK3 $\beta$ :tGSK3 $\beta$ | pmTOR:tmTOR |
|--|-----------|--------------------------------|------------------------------|-------------|
|--|-----------|--------------------------------|------------------------------|-------------|

|                                 | <b>F (DFn, DFd)</b> | <b>P value</b> | <b>F (DFn, DFd)</b> | <b>P value</b> | <b>F (DFn, DFd)</b> | <b>P value</b> | <b>F (DFn, DFd)</b> | <b>P value</b> |
|---------------------------------|---------------------|----------------|---------------------|----------------|---------------------|----------------|---------------------|----------------|
| <b>Treatment</b>                | F (1, 40) = 1.034   | P=0.3154       | F (1, 43) = 0.951   | P=0.3350       | F (1, 43) = 1.322   | P=0.2565       | F (1, 38) = 2.355   | P=0.1332       |
| <b>Stress</b>                   | F (1, 40) = 24.28   | P<0.0001       | F (1, 43) = 37.35   | P<0.0001       | F (1, 43) = 16.03   | P=0.0002       | F (1, 38) = 3.673   | P=0.0628       |
| <b>Sex</b>                      | F (1, 40) = 9.936   | P=0.0031       | F (1, 43) = 11.88   | P=0.0013       | F (1, 43) = 0.2618  | P=0.6115       | F (1, 38) = 21.50   | P<0.0001       |
| <b>Treatment x Stress</b>       | F (1, 40) = 0.7455  | P=0.3931       | F (1, 43) = 0.015   | P=0.9031       | F (1, 43) = 0.7611  | P=0.3878       | F (1, 38) = 5.188   | P=0.0284       |
| <b>Treatment x Sex</b>          | F (1, 40) = 0.0843  | P=0.7731       | F (1, 43) = 0.064   | P=0.8009       | F (1, 43) = 1.266   | P=0.2668       | F (1, 38) = 1.643   | P=0.2077       |
| <b>Stress x Sex</b>             | F (1, 40) = 10.93   | P=0.0020       | F (1, 43) = 4.688   | P=0.0360       | F (1, 43) = 0.0013  | P=0.9716       | F (1, 38) = 9.724   | P=0.0035       |
| <b>Treatment x Stress x Sex</b> | F (1, 40) = 0.1979  | P=0.6588       | F (1, 43) = 2.359   | P=0.1319       | F (1, 43) = 0.4216  | P=0.5196       | F (1, 38) = 0.056   | P=0.8140       |
|                                 | <b>BDNF</b>         |                | <b>D1-R</b>         |                | <b>D2-R</b>         |                |                     |                |
|                                 | <b>F (DFn, DFd)</b> | <b>P value</b> | <b>F (DFn, DFd)</b> | <b>P value</b> | <b>F (DFn, DFd)</b> | <b>P value</b> |                     |                |
| <b>Treatment</b>                | F (1, 36) = 0.7454  | P=0.3936       | F (1, 41) = 0.379   | P=0.5418       | F (1, 40) = 0.9516  | P=0.3352       |                     |                |
| <b>Stress</b>                   | F (1, 36) = 1.125   | P=0.2959       | F (1, 41) = 12.78   | P=0.0009       | F (1, 40) = 0.1537  | P=0.6971       |                     |                |
| <b>Sex</b>                      | F (1, 36) = 0.1721  | P=0.6807       | F (1, 41) = 20.57   | P<0.0001       | F (1, 40) = 0.9008  | P=0.3483       |                     |                |
| <b>Treatment x Stress</b>       | F (1, 36) = 24.22   | P<0.0001       | F (1, 41) = 1.037   | P=0.3145       | F (1, 40) = 3.870   | P=0.0561       |                     |                |
| <b>Treatment x Sex</b>          | F (1, 36) = 0.0838  | P=0.7739       | F (1, 41) = 1.270   | P=0.2664       | F (1, 40) = 1.751   | P=0.1933       |                     |                |
| <b>Stress x Sex</b>             | F (1, 36) = 0.4944  | P=0.4865       | F (1, 41) = 14.96   | P=0.0004       | F (1, 40) = 3.431   | P=0.0714       |                     |                |
| <b>Treatment x Stress x Sex</b> | F (1, 36) = 0.3339  | P=0.5670       | F (1, 41) = 0.211   | P=0.6485       | F (1, 40) = 0.1763  | P=0.6768       |                     |                |
